# Supplementary material for: A linkage map of transcribed single nucleotide polymorphisms in rohu (Labeo rohita) and QTL associated with resistance to Aeromonas hydrophila
Source: PubMed Central journal article supplement (PMC4226992; doi:10.1186/1471-2164-15-541), 2014-06-30

# LG1

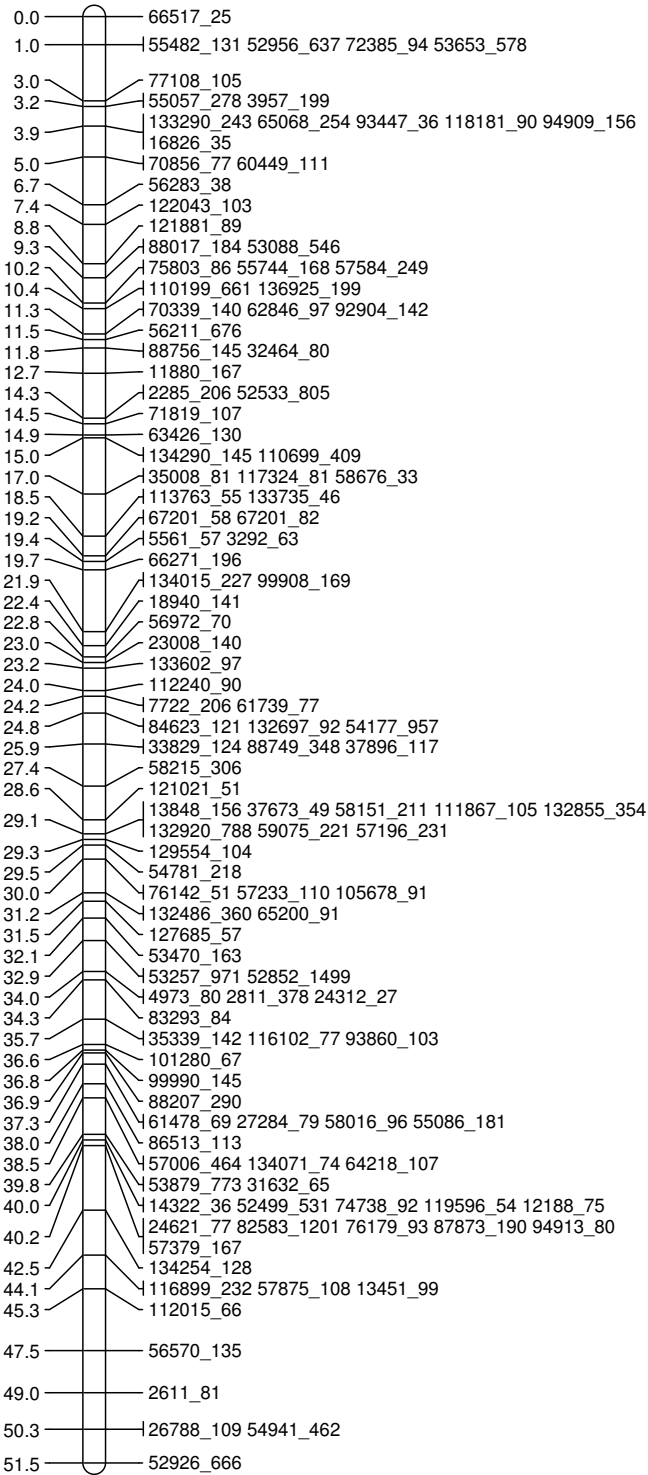

# LG2

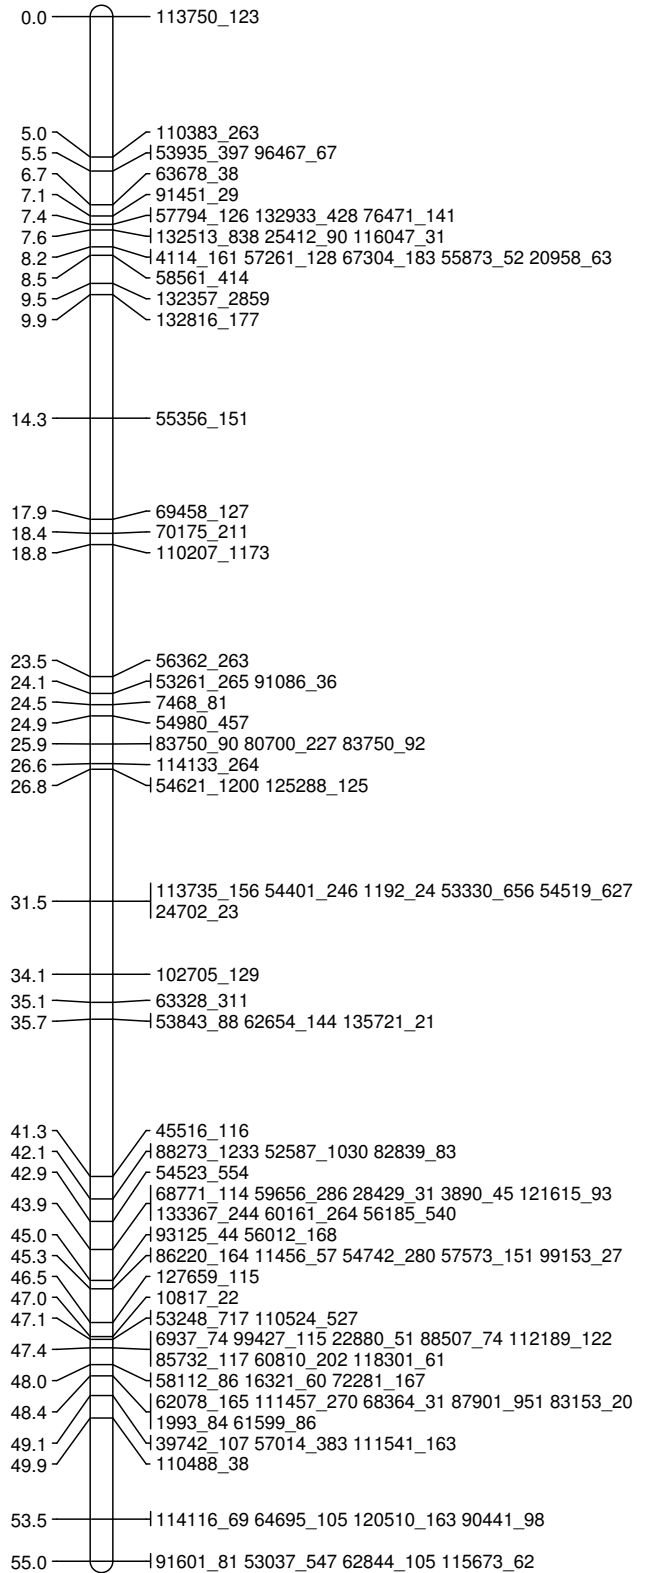

# LG3

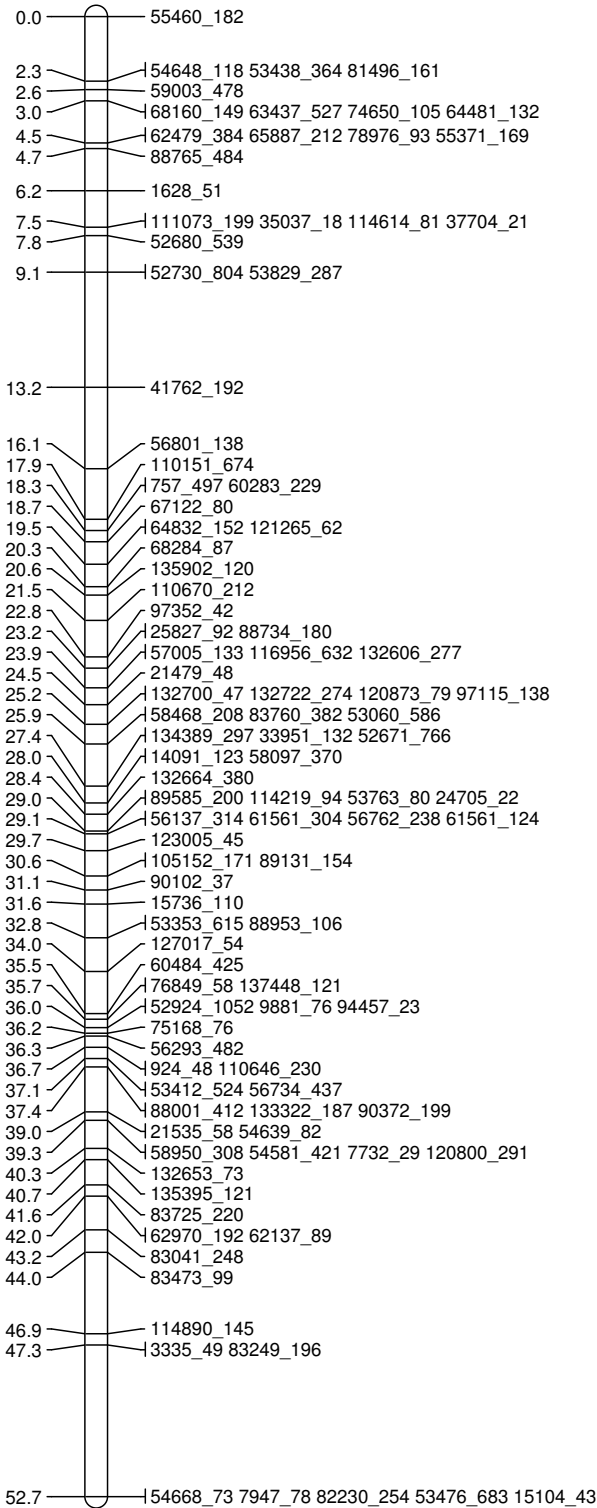

# LG4

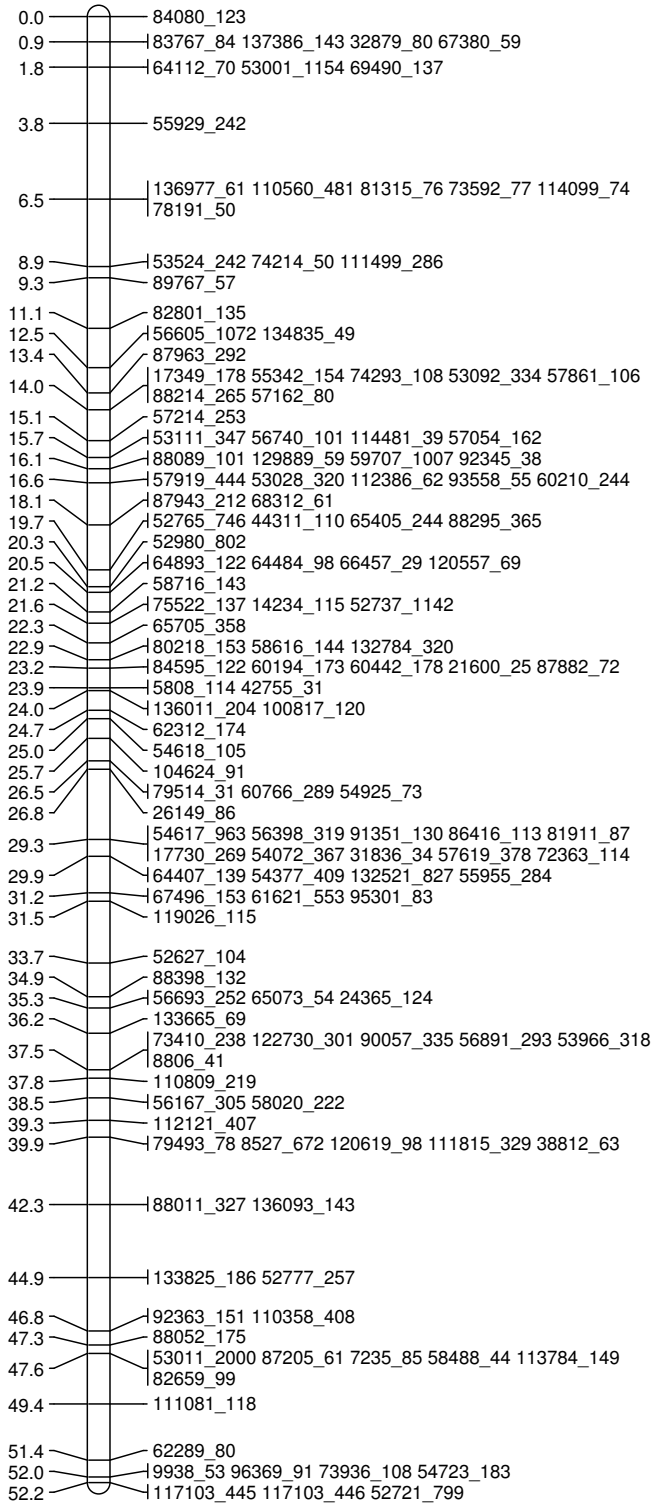

# LG5

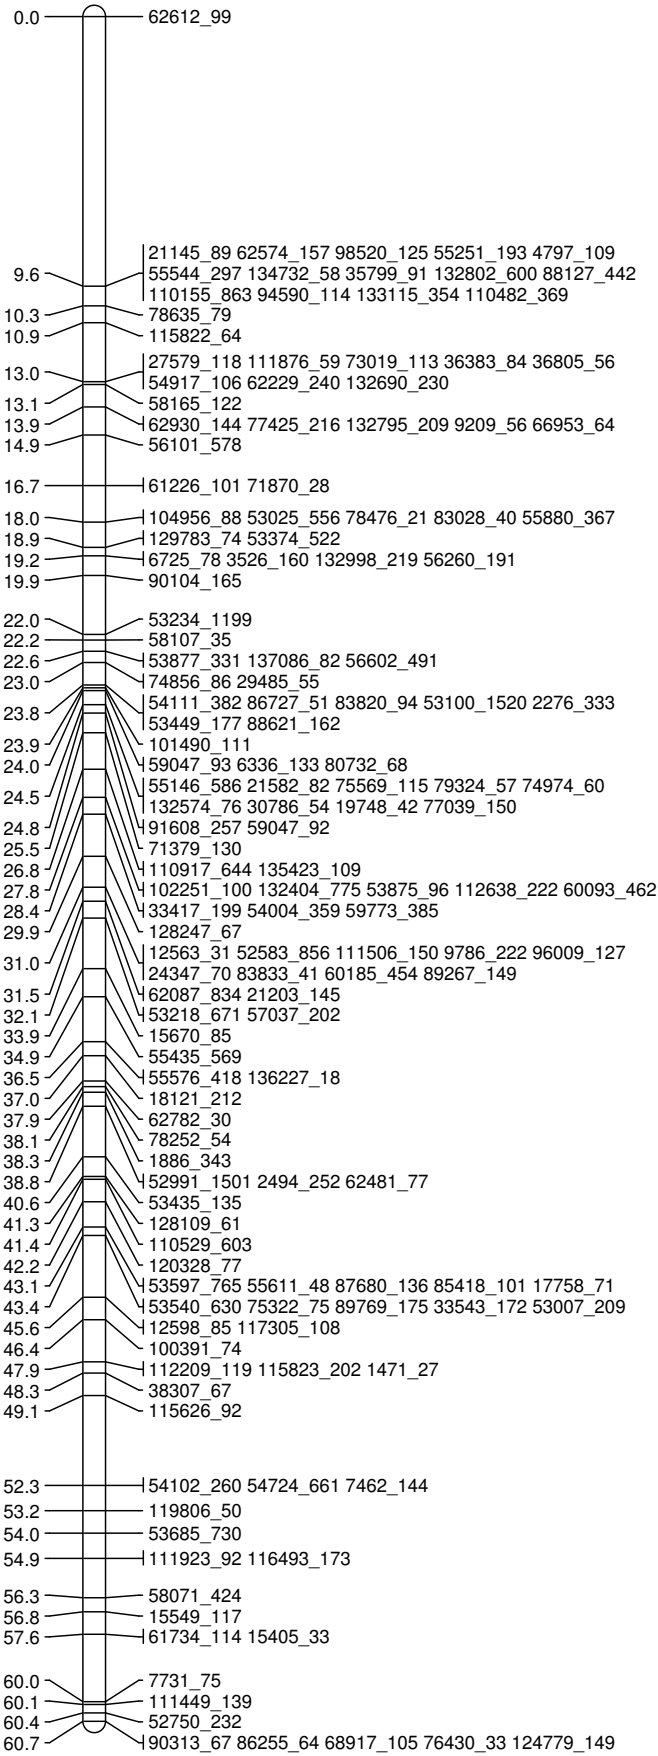

# LG6

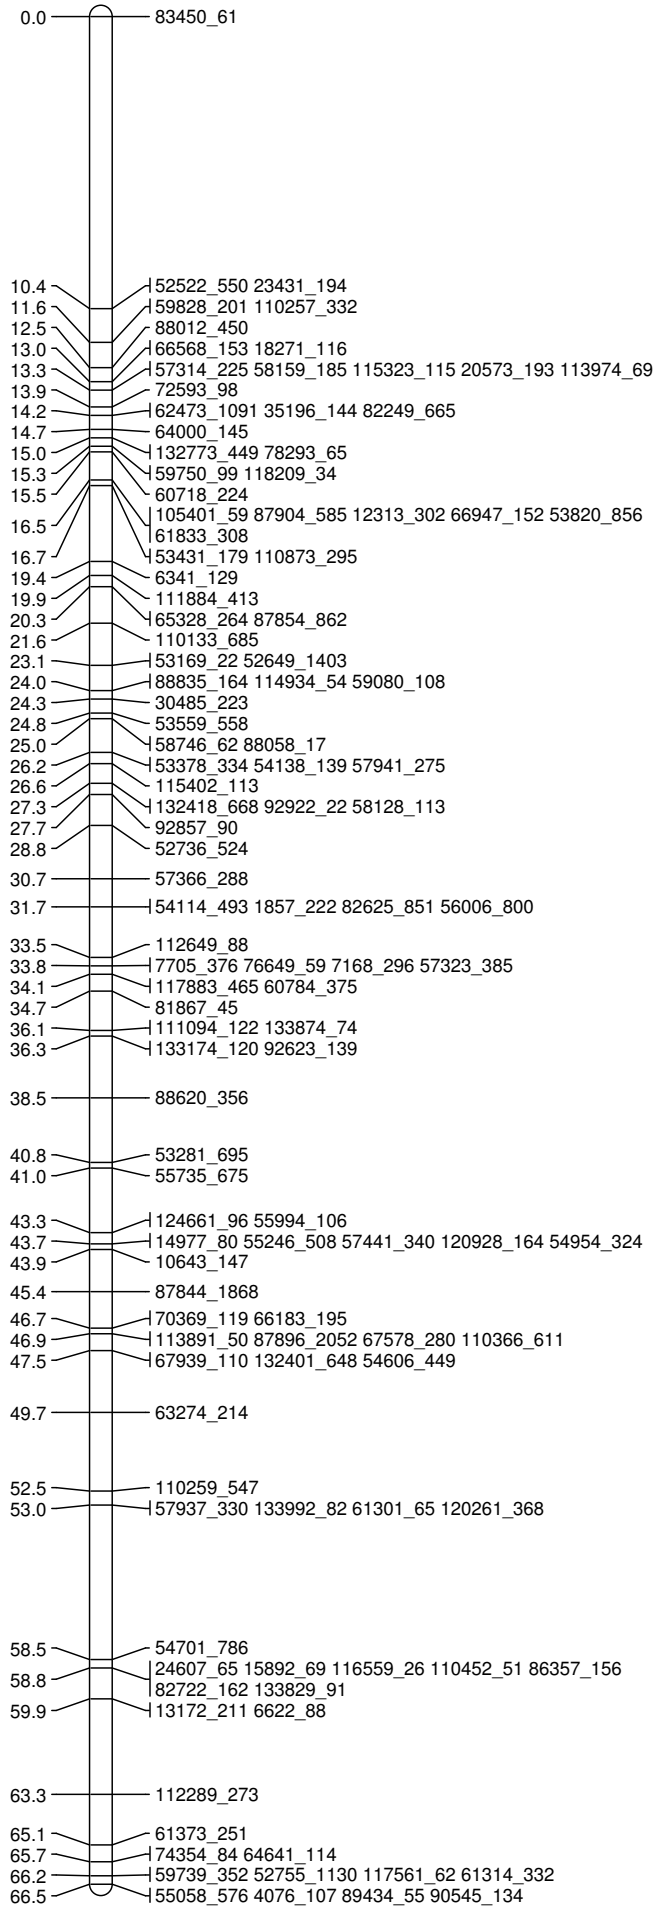

# LG7

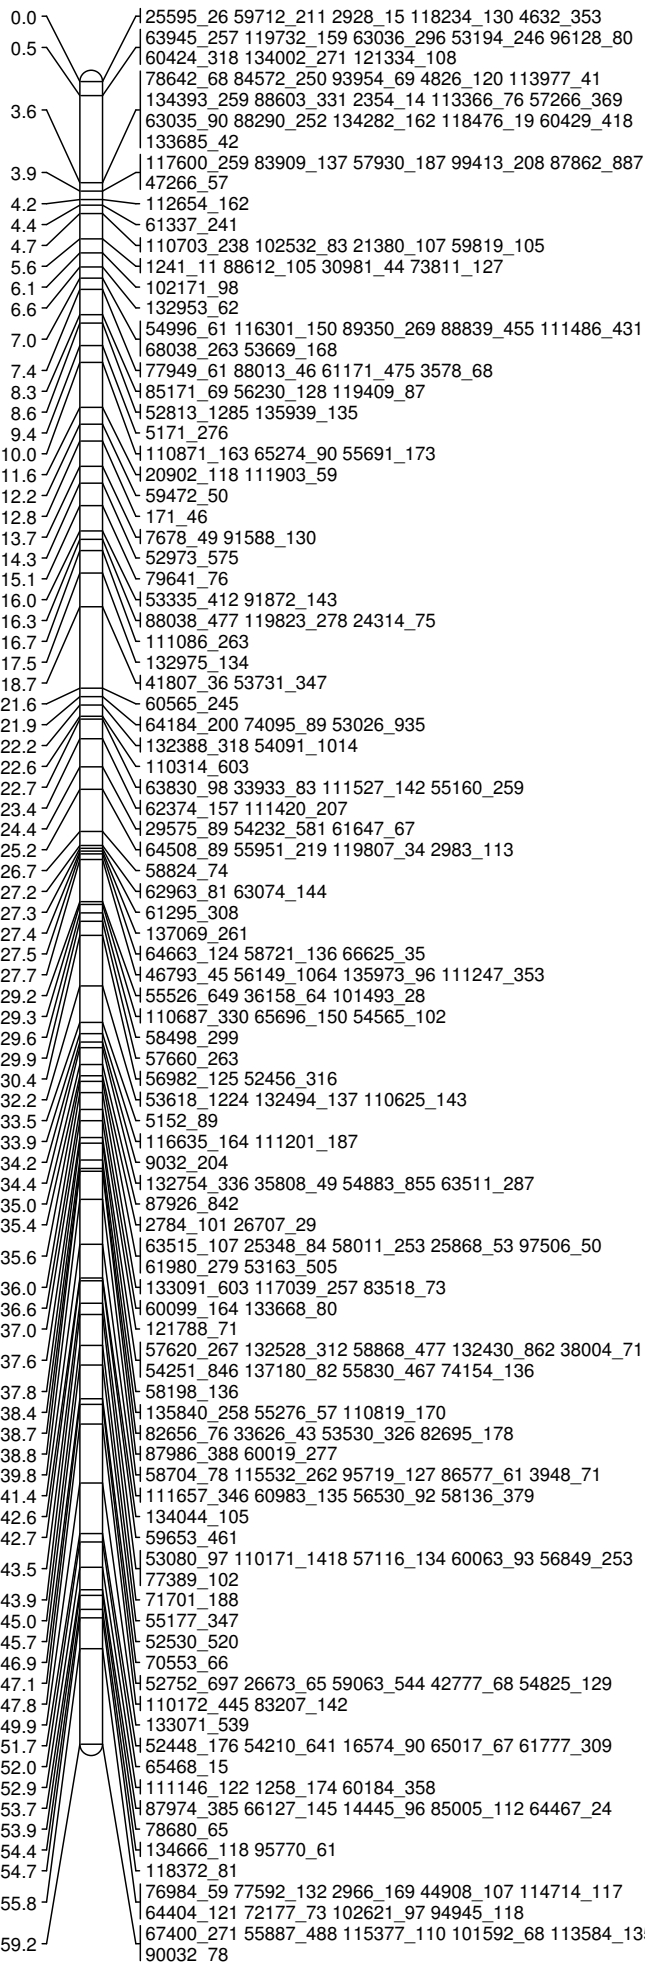

# LG8

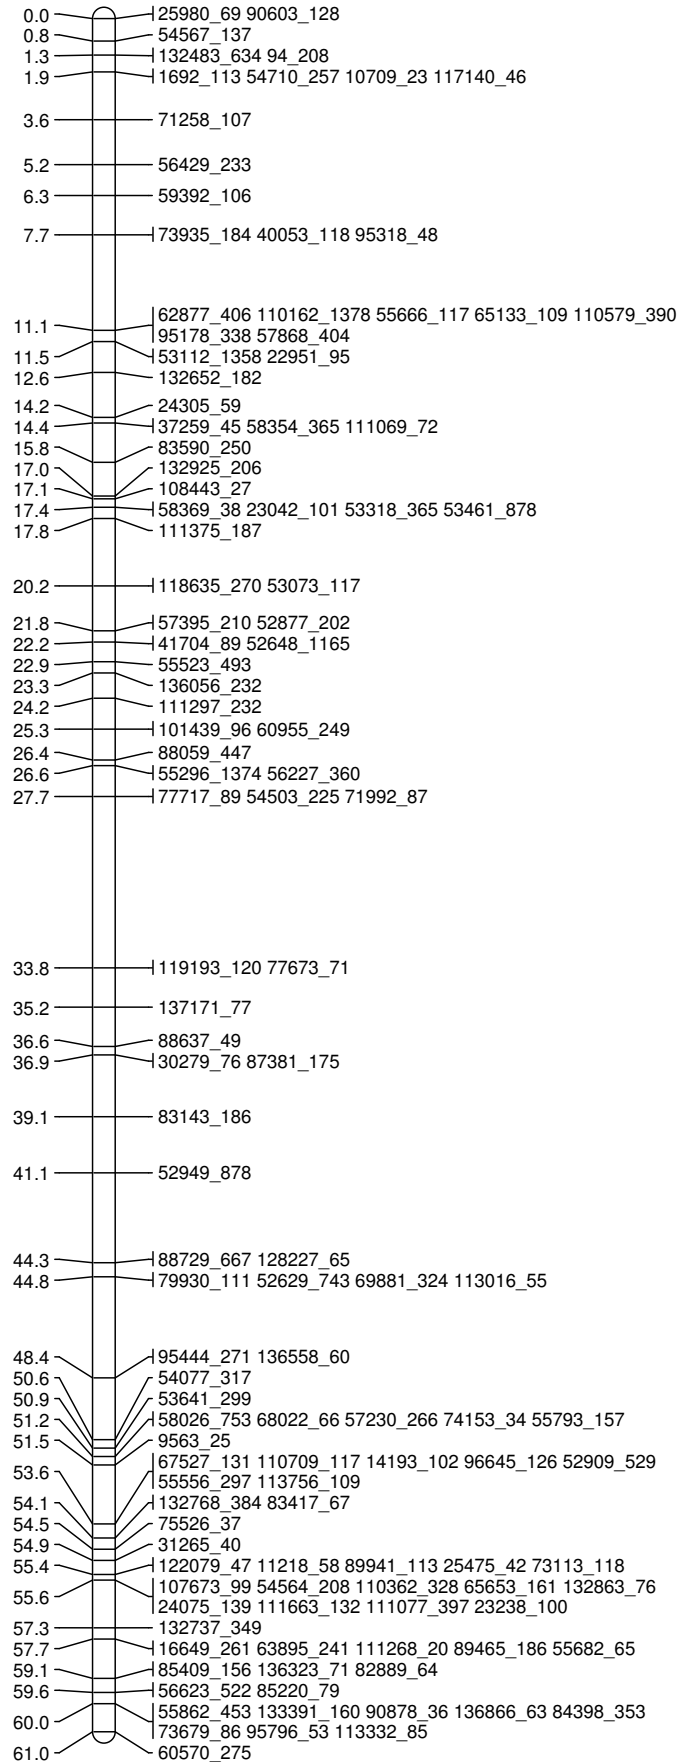

# LG9

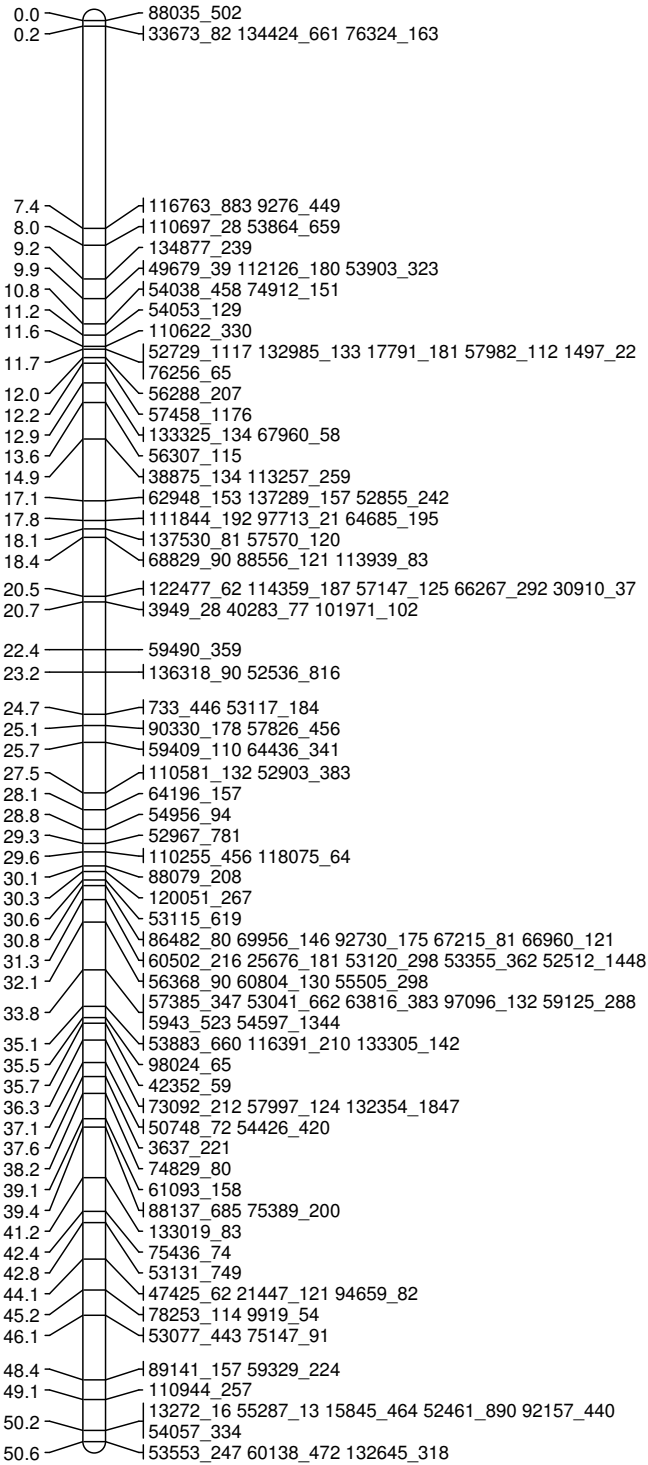

# LG10

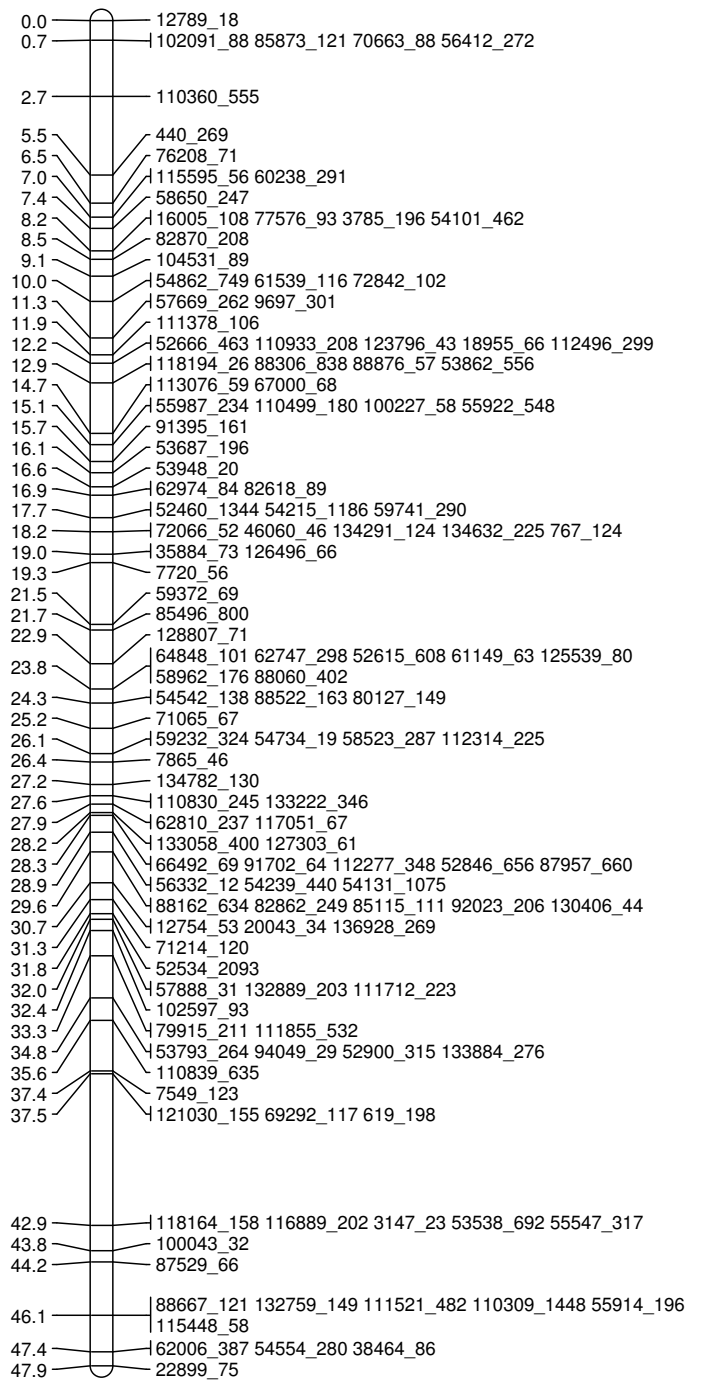

# LG11

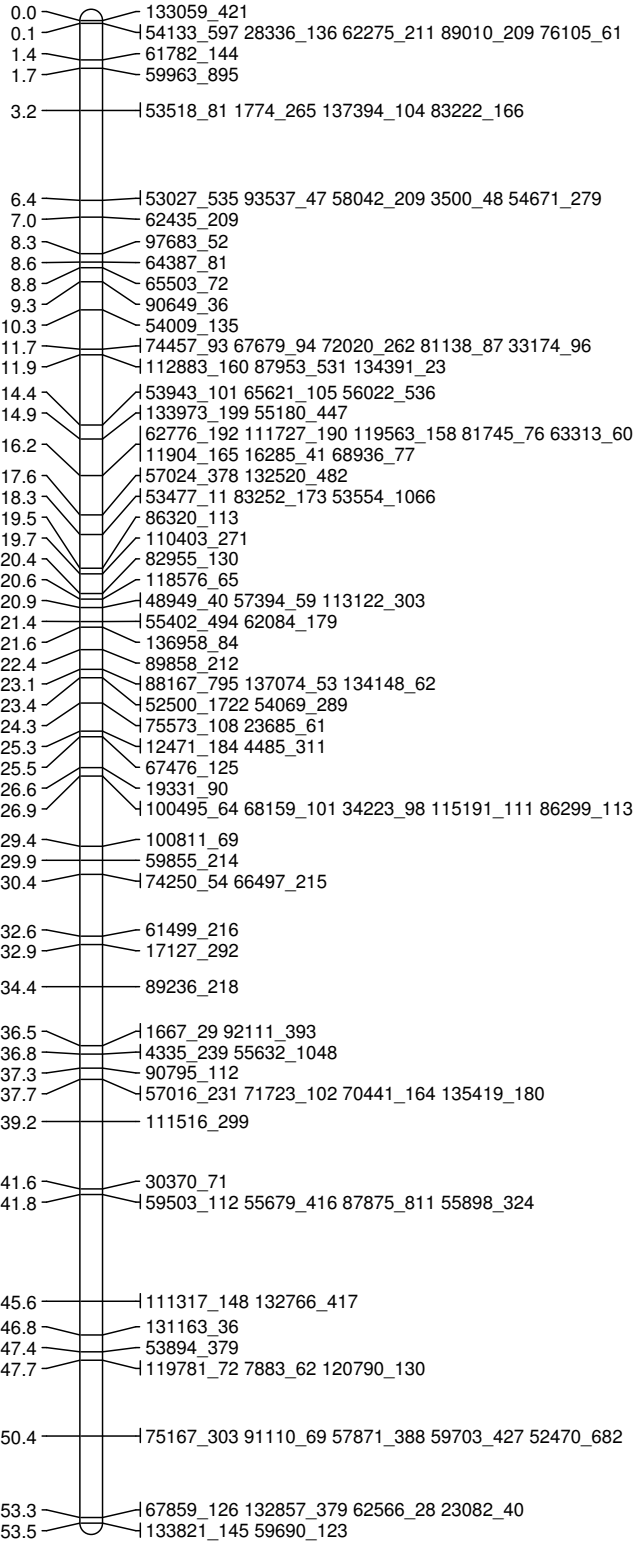

# LG12

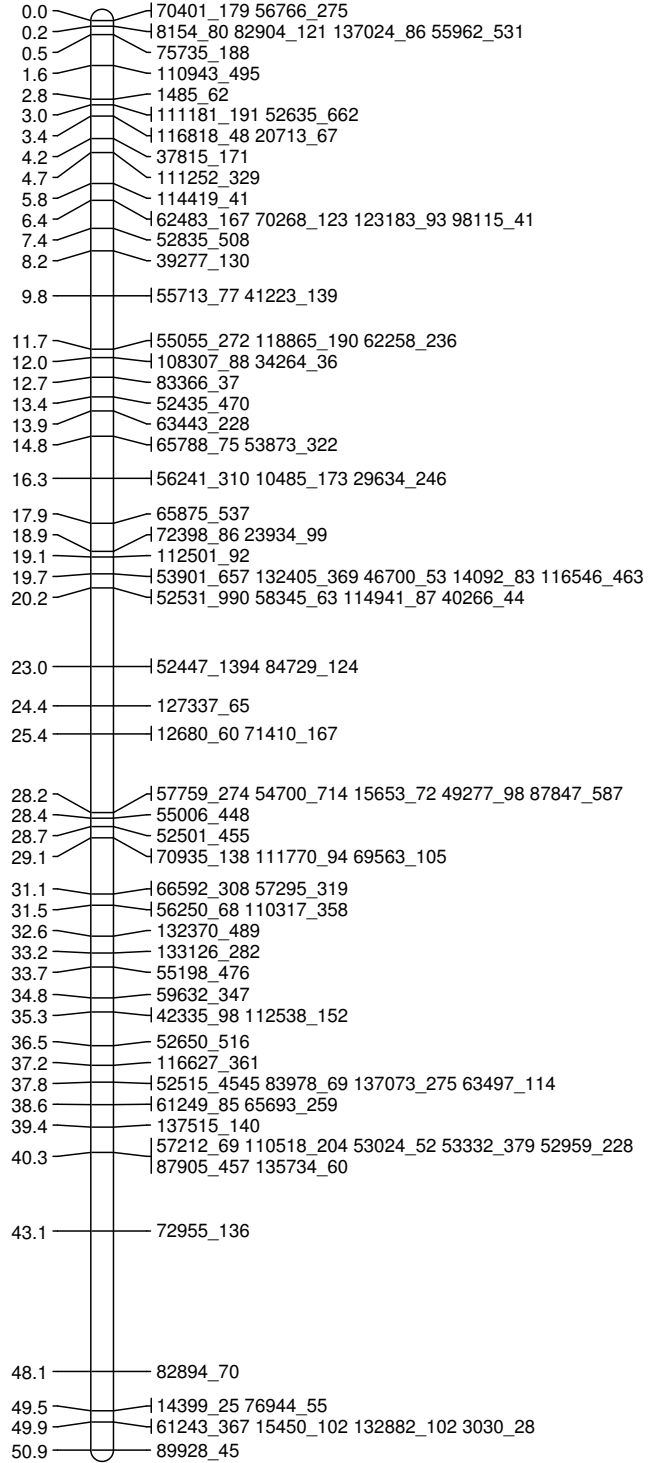

# LG13

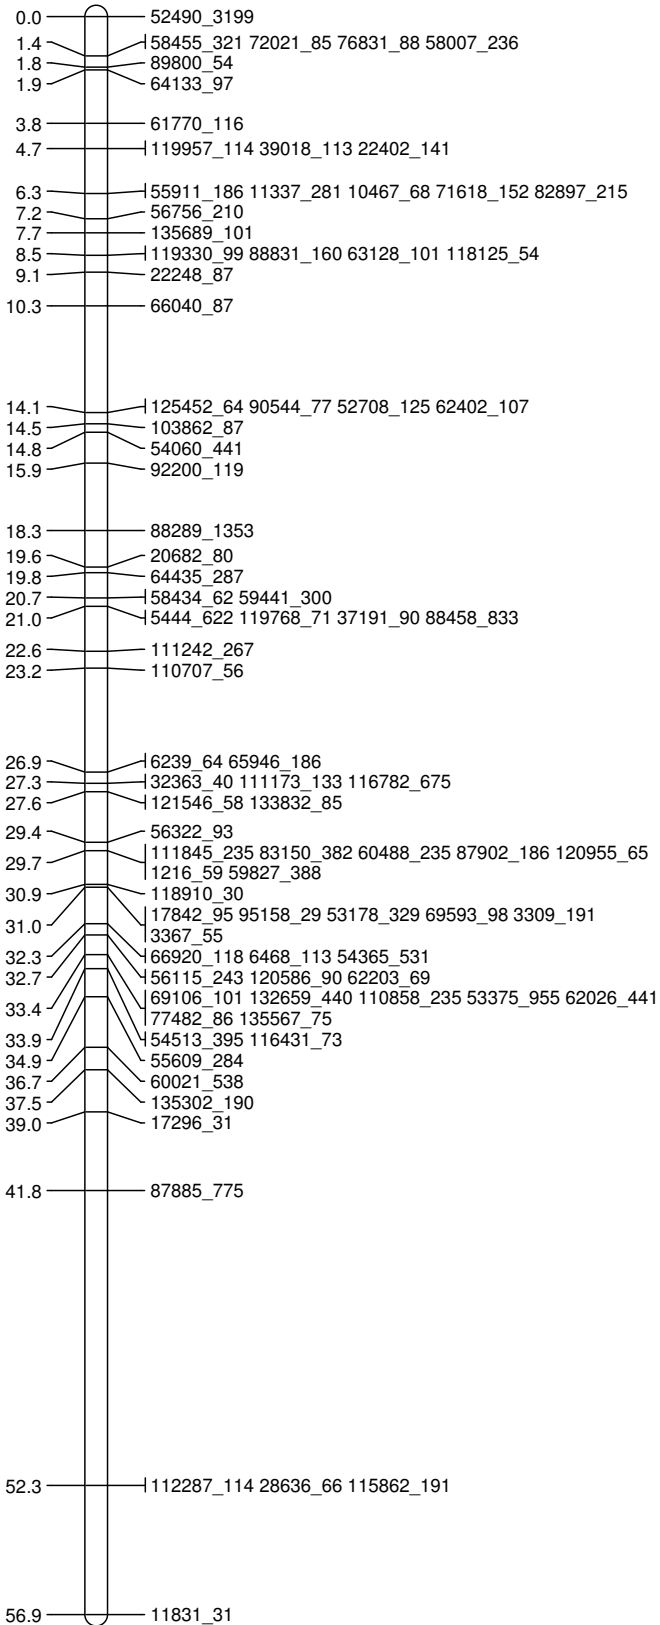

# LG14

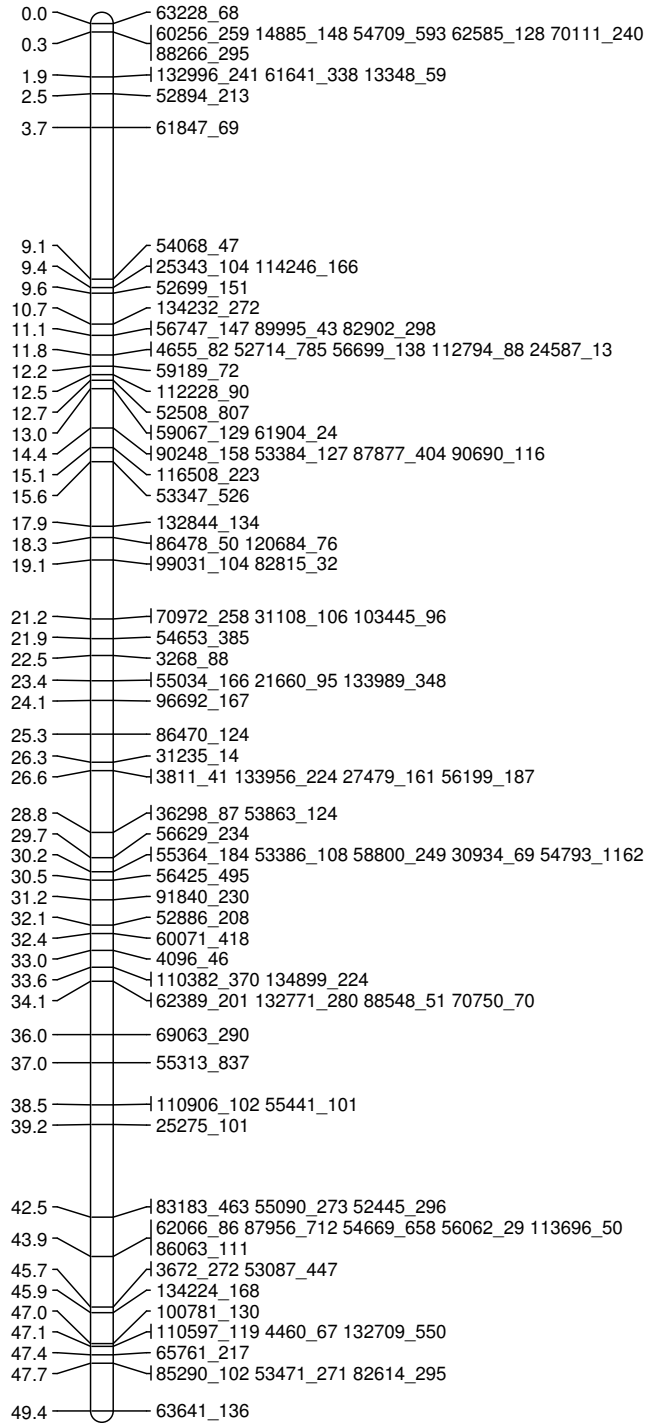

# LG15

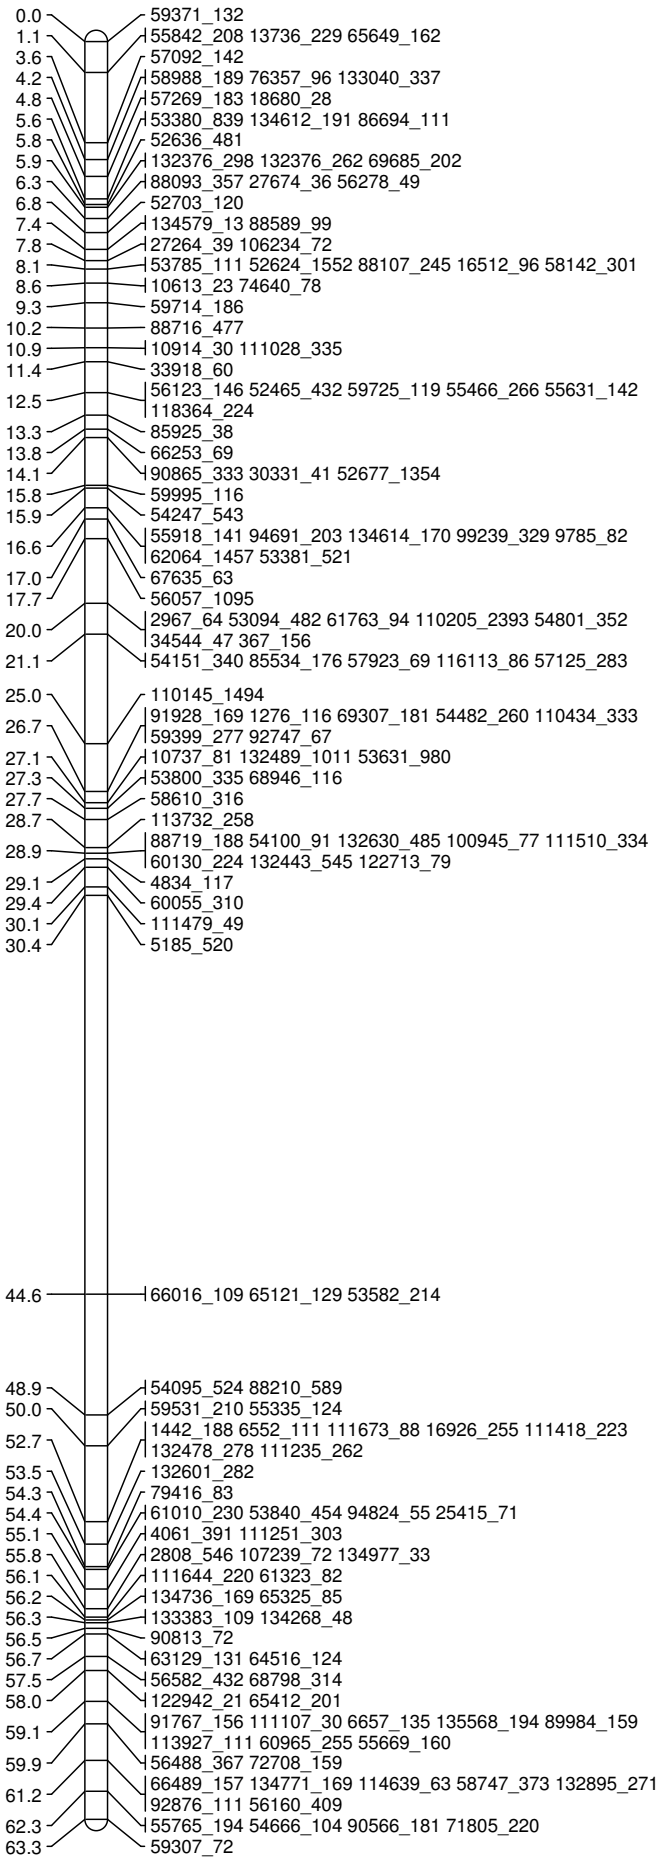

# LG16

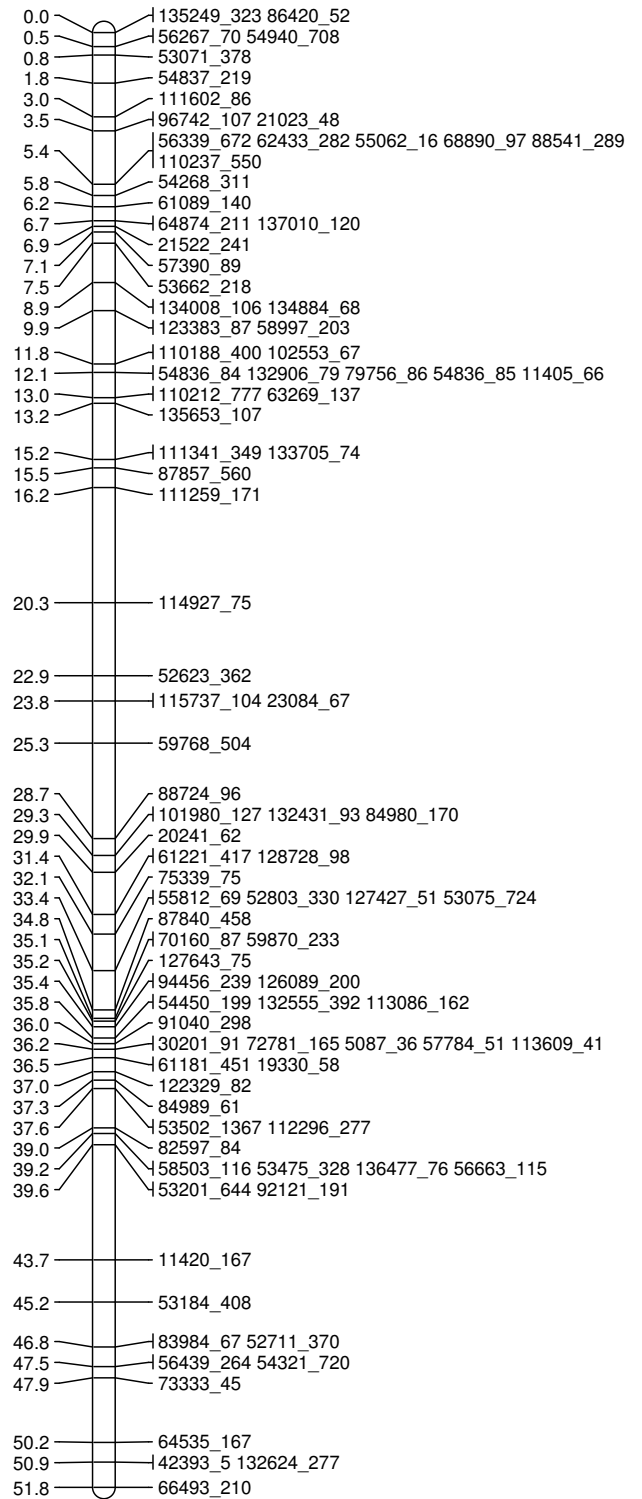



# LG17

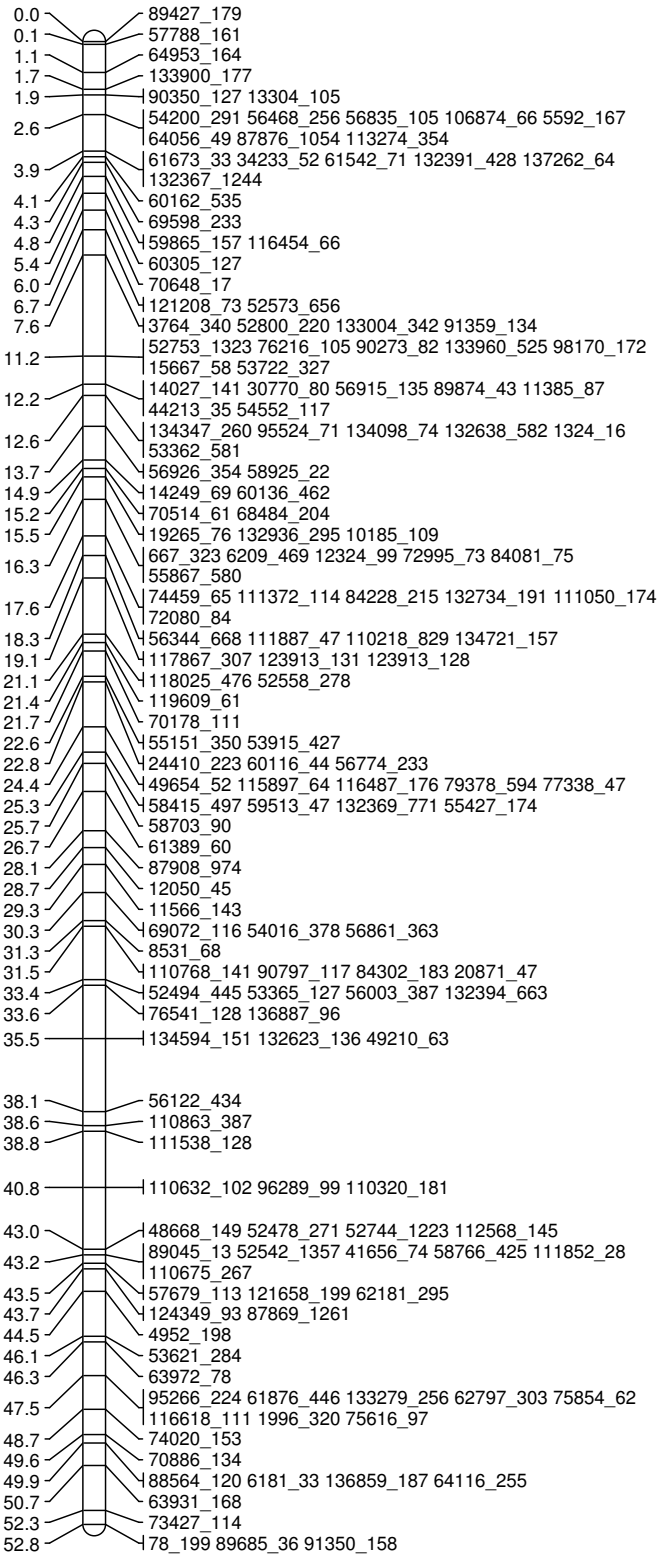

# LG18

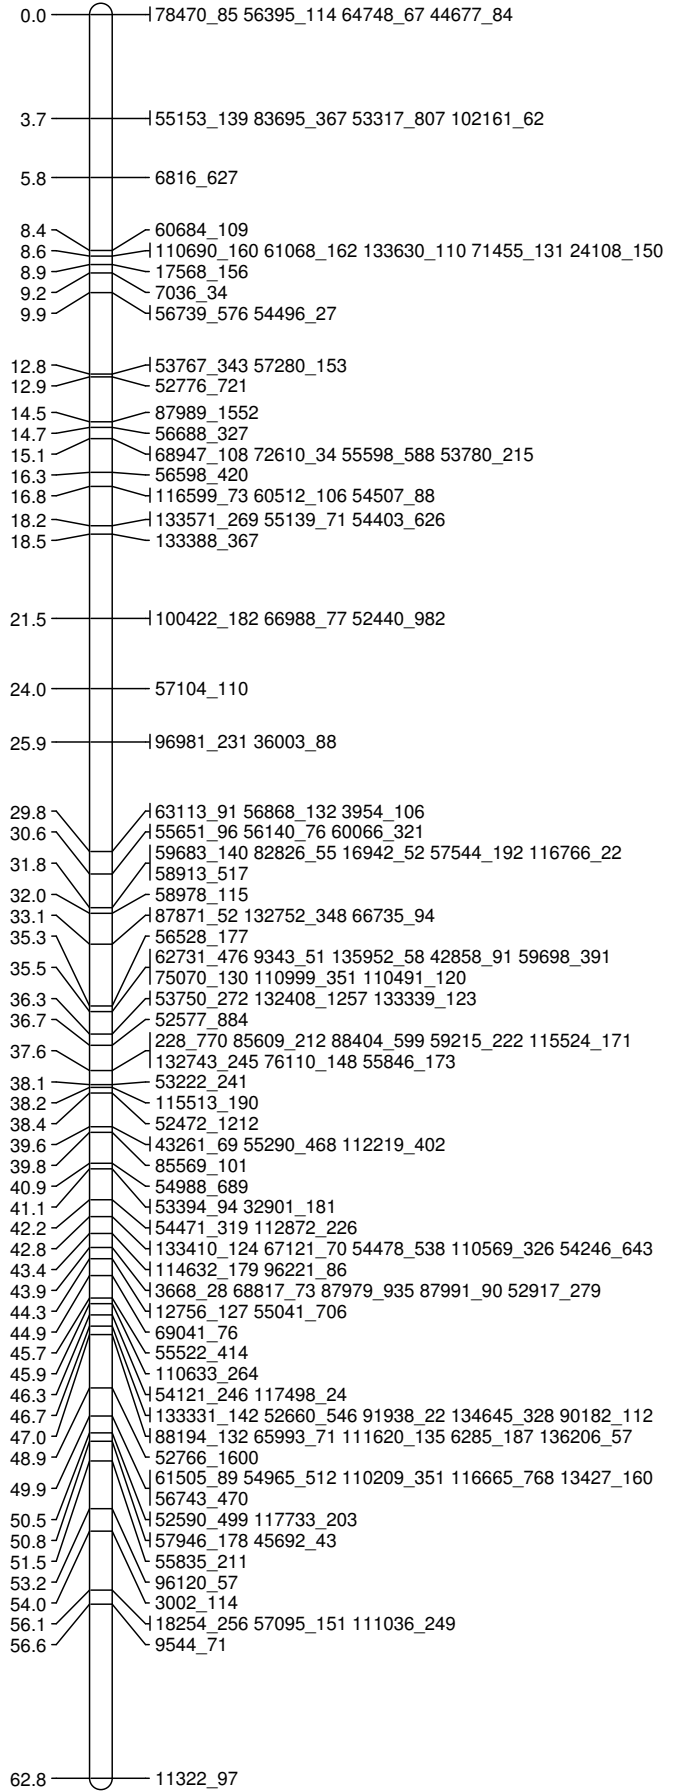

# LG19

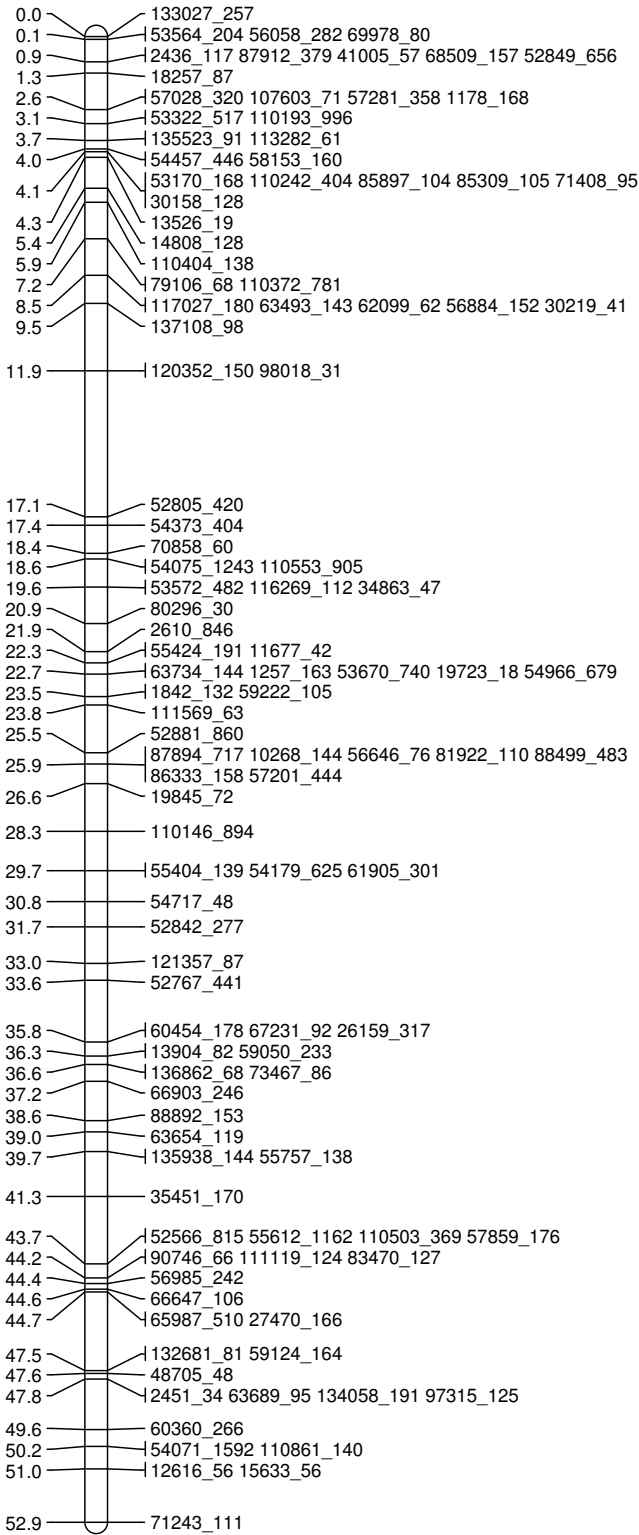

# LG20

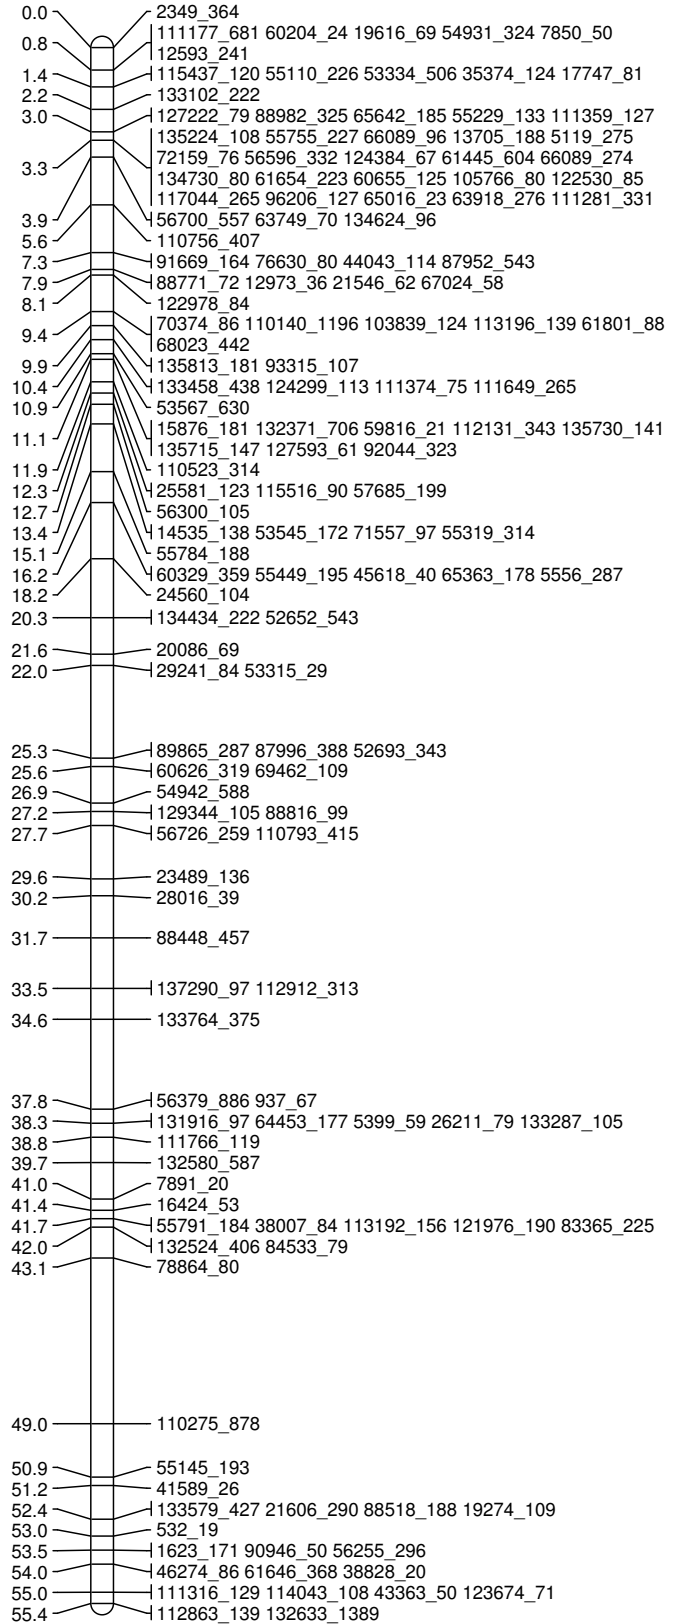

# LG21

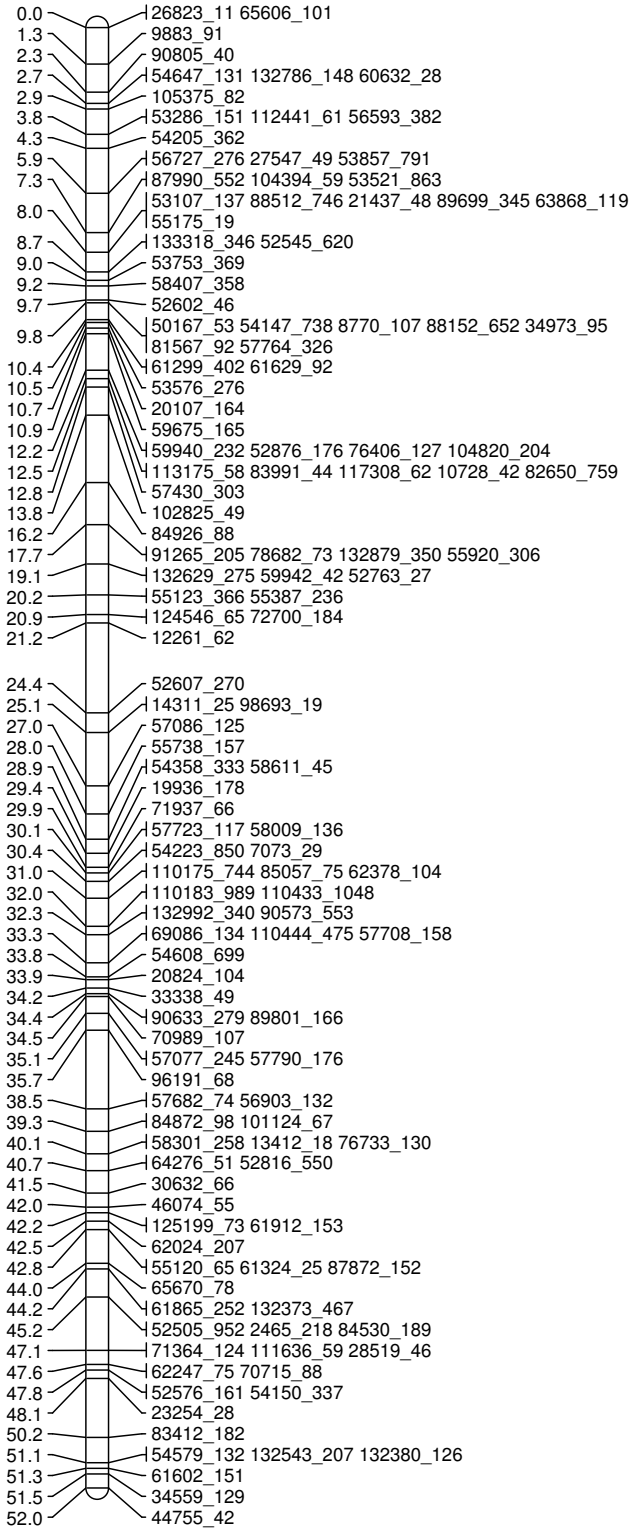

# LG22

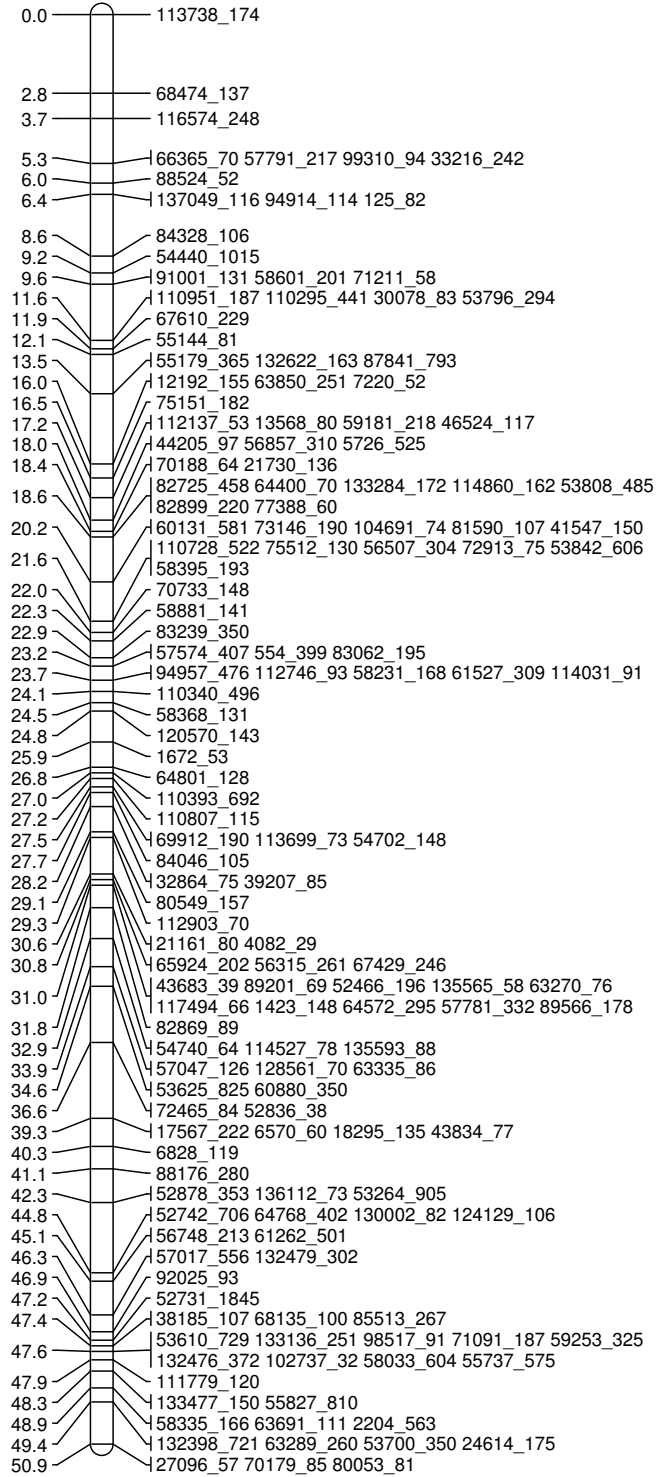

# LG23

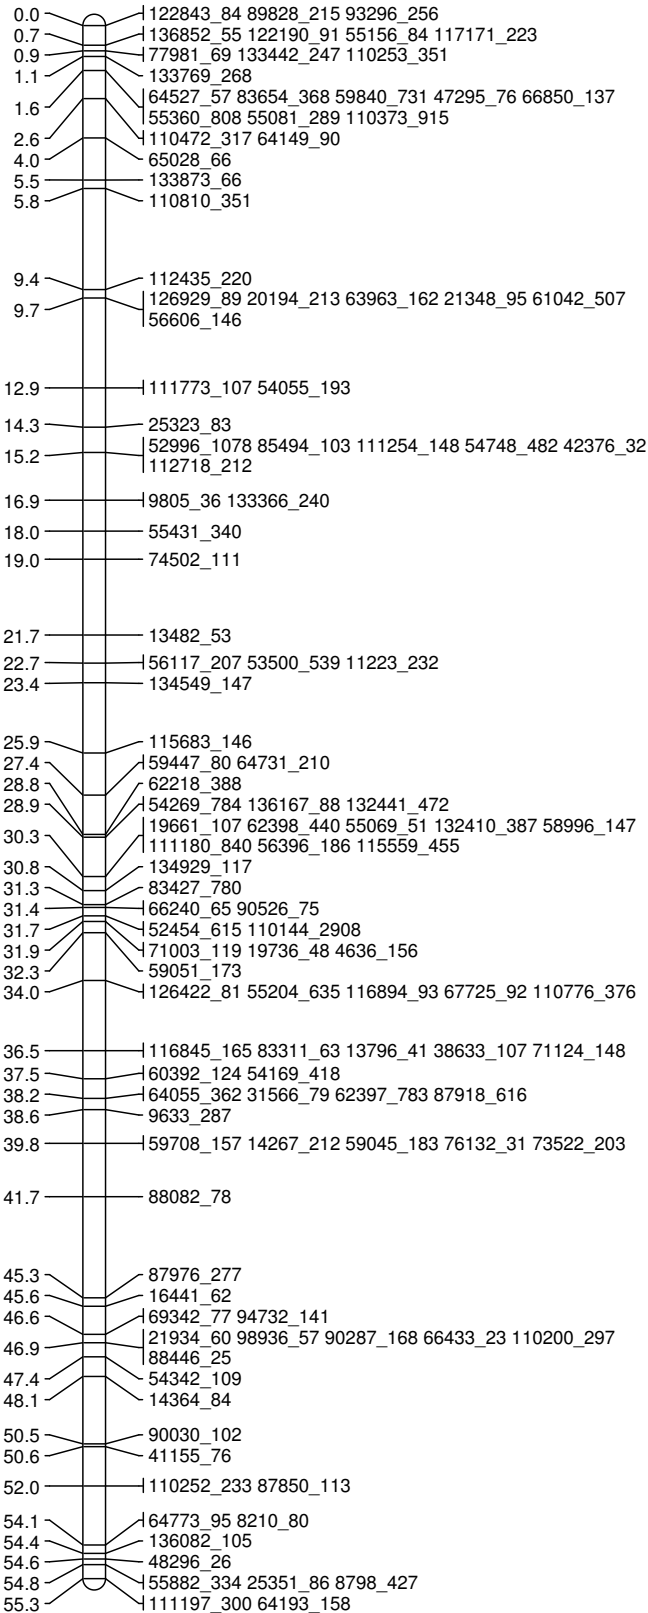

# LG24

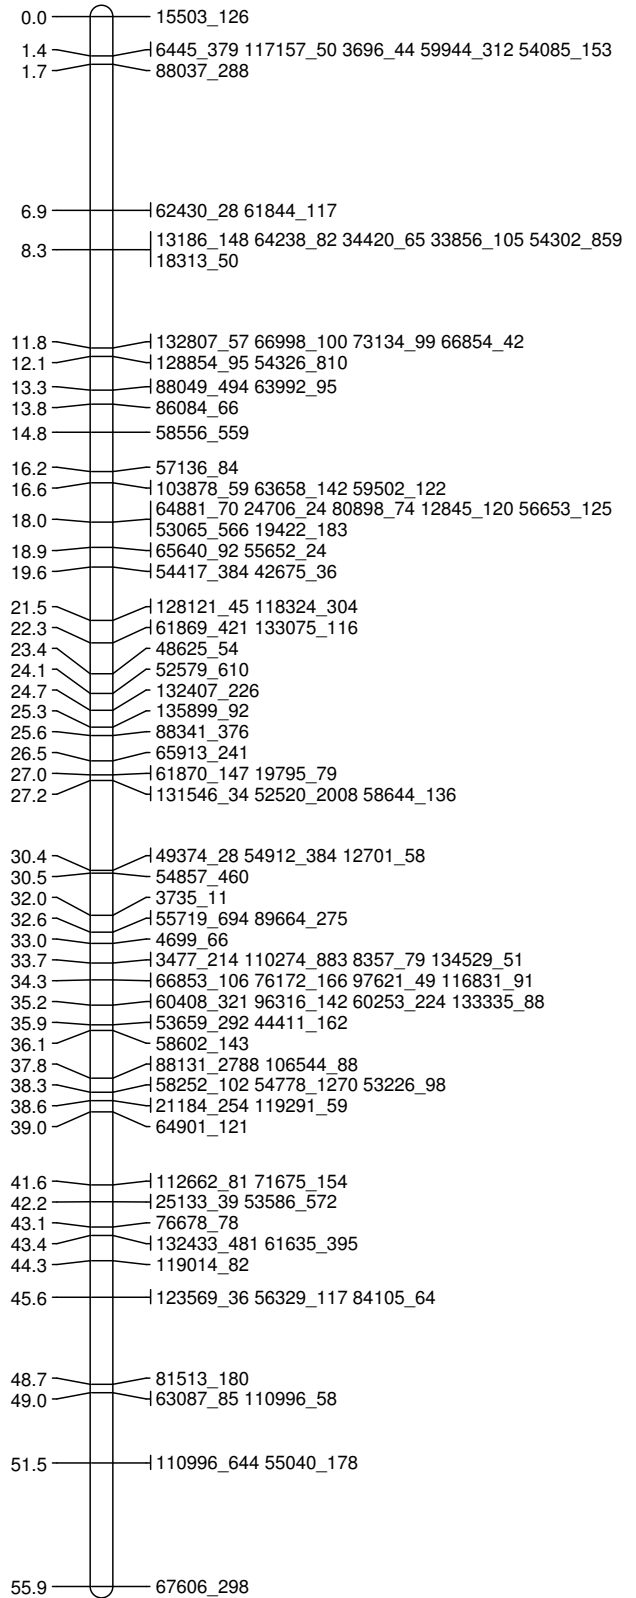

# LG25

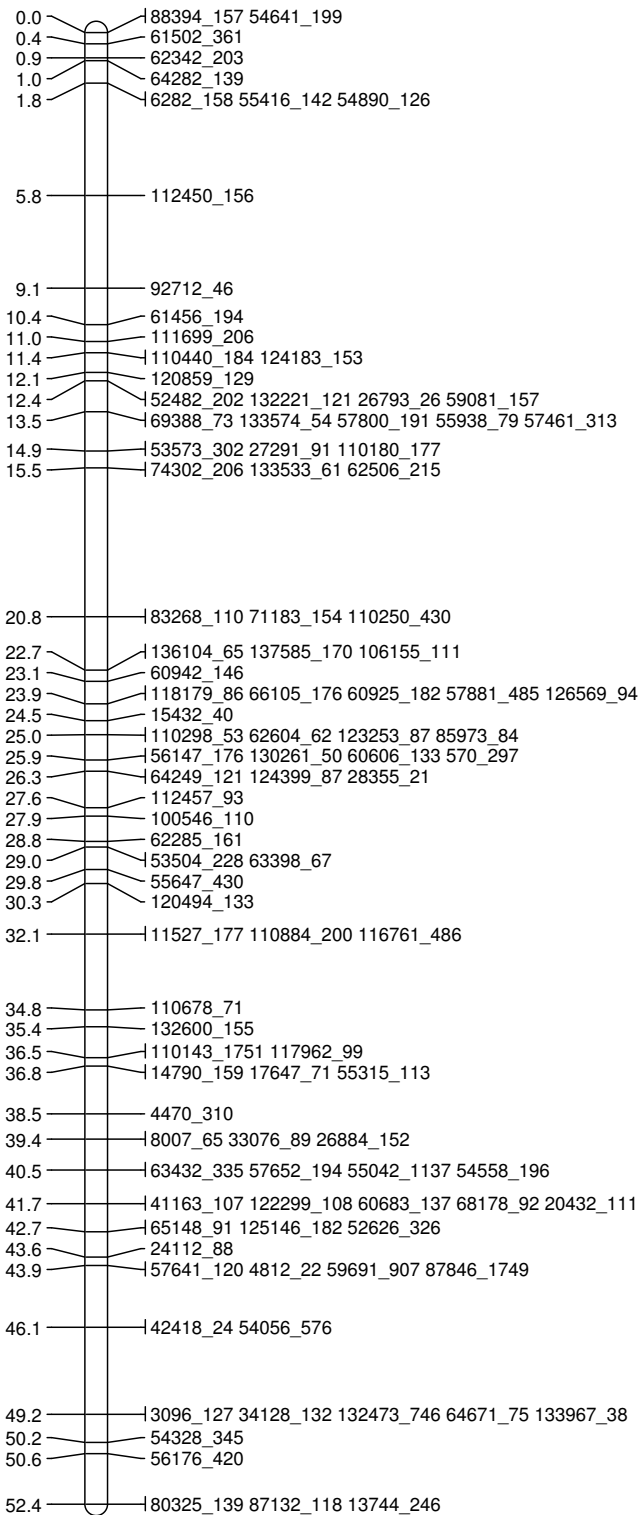

Supplement: 1471-2164-15-541-S1.pdf [file 1471-2164-15-541-S1.pdf]
