# Supplementary material for: A linkage map of transcribed single nucleotide polymorphisms in rohu (Labeo rohita) and QTL associated with resistance to Aeromonas hydrophila
Source: PubMed Central journal article supplement (PMC4226992; doi:10.1186/1471-2164-15-541), 2014-06-30

**A**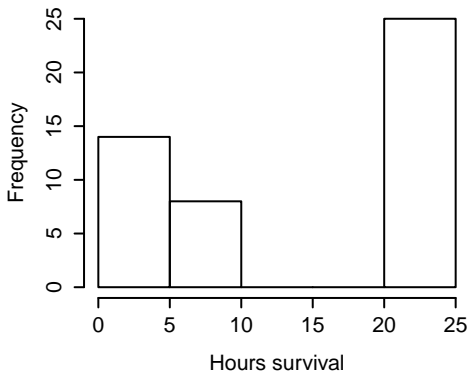**B**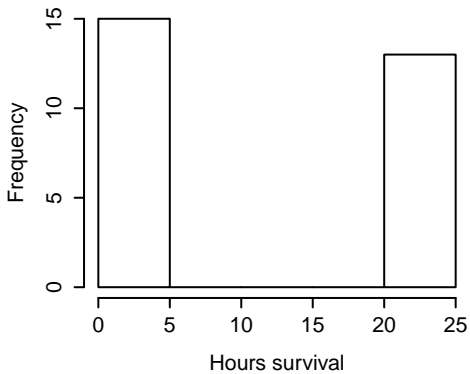**C**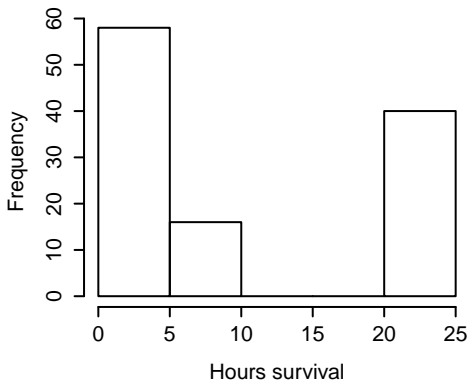**D**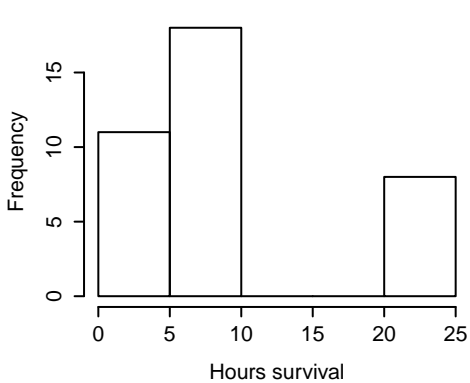**E**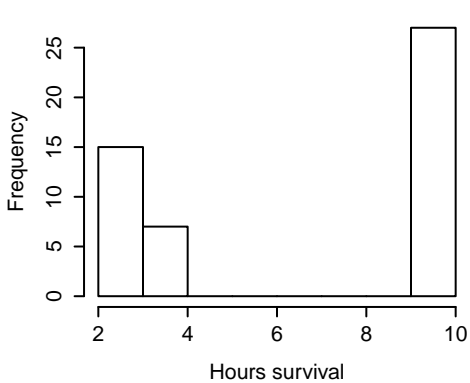**F**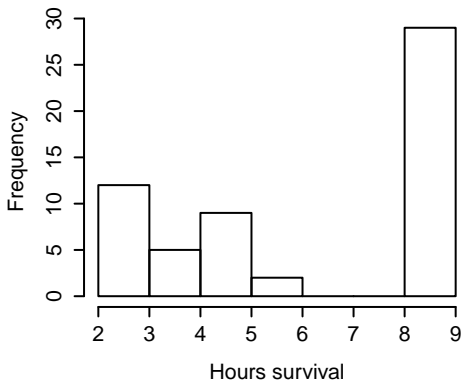**G**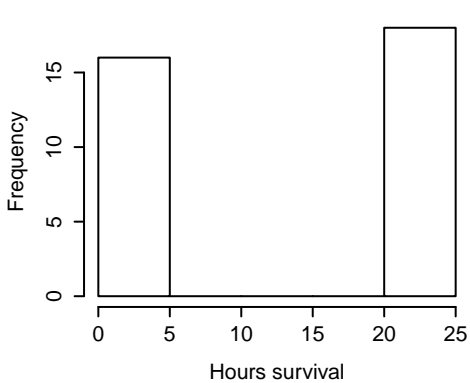**H**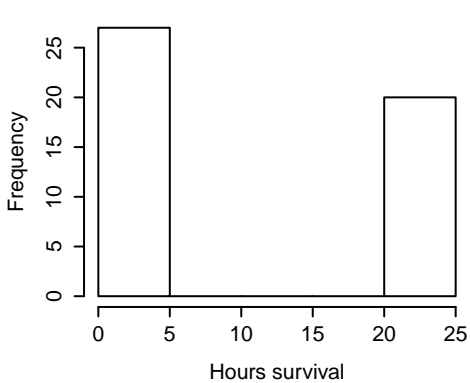

**I**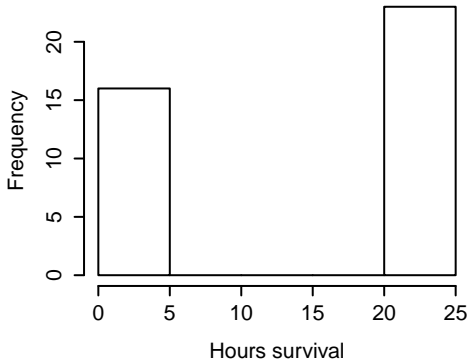**J**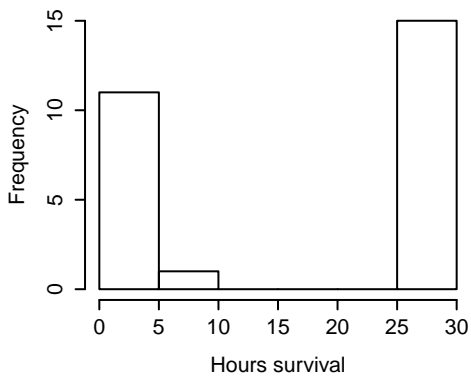**K**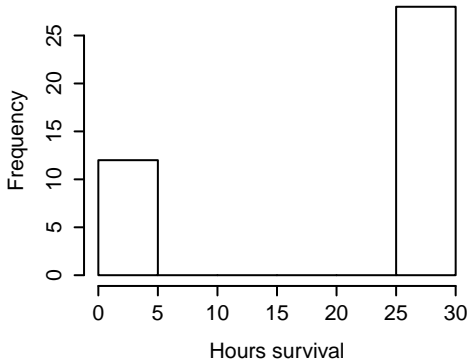**L**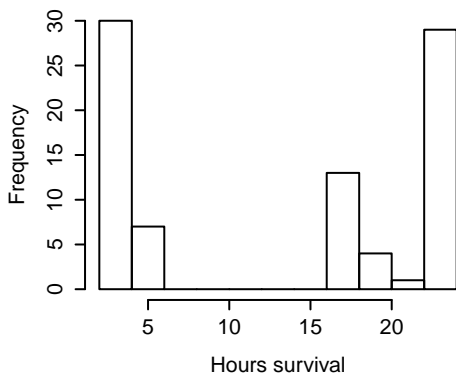**M**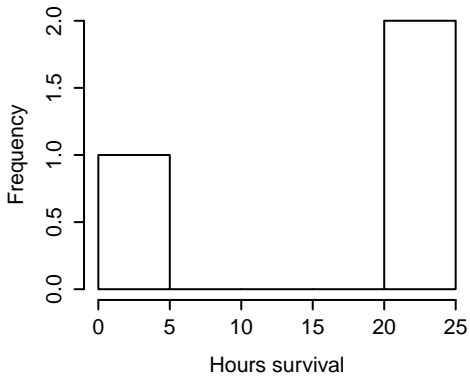**N**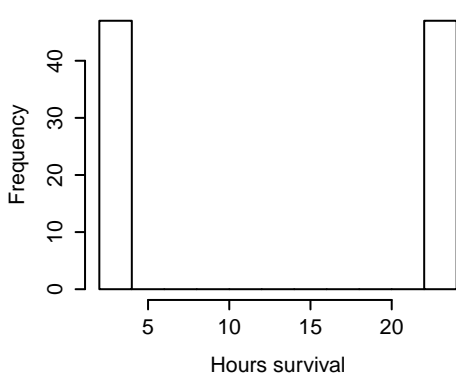**O**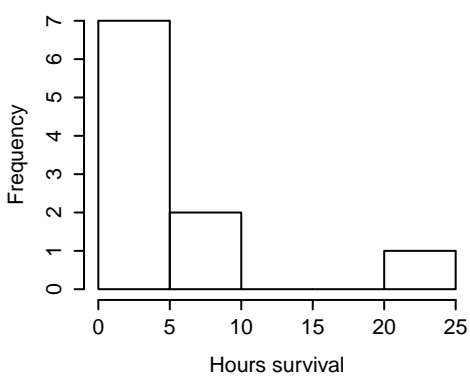**P**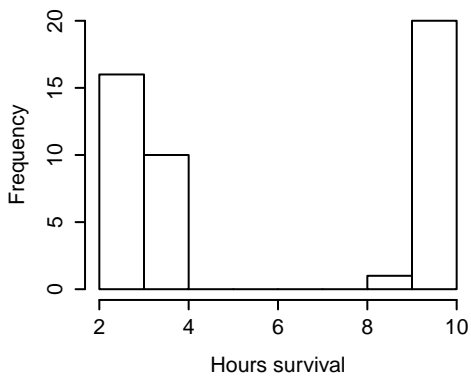

**Q**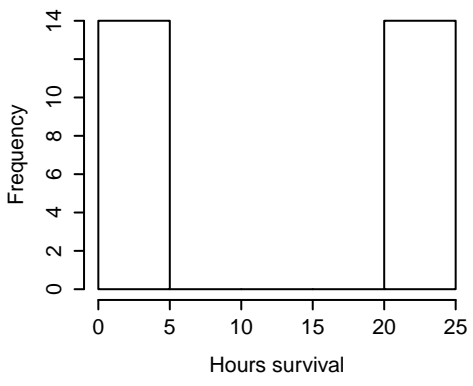**R**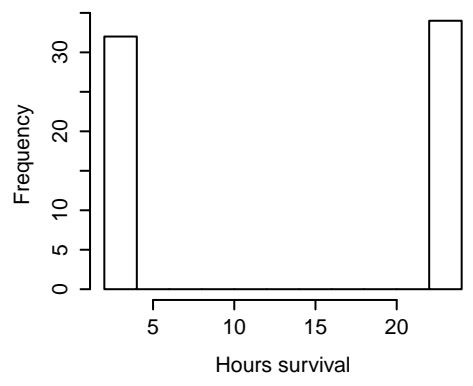**S**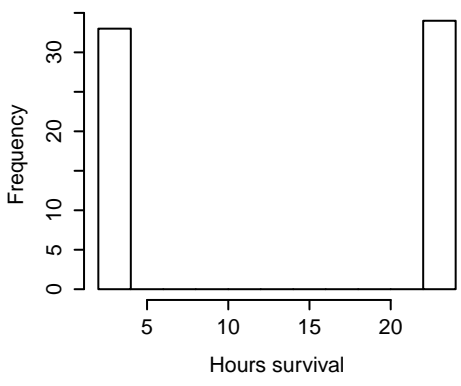**T**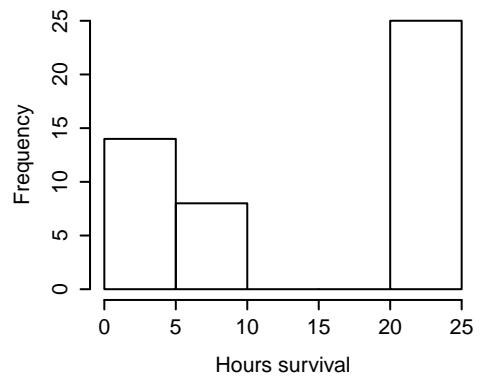**U**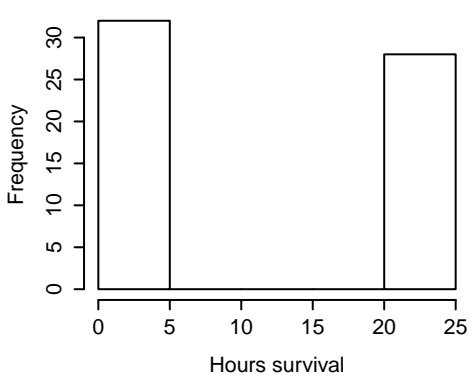

Supplement: 1471-2164-15-541-S4.pdf [file 1471-2164-15-541-S4.pdf]
